# Supplementary material
Source: PubMed Central journal article supplement (PMC141051)

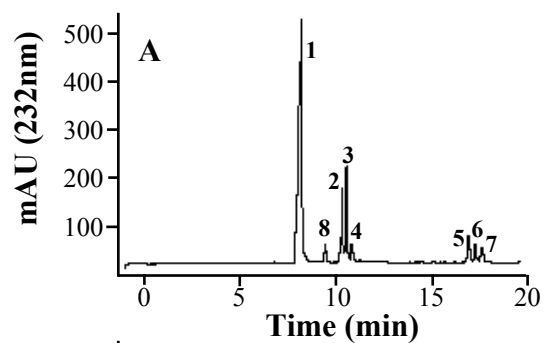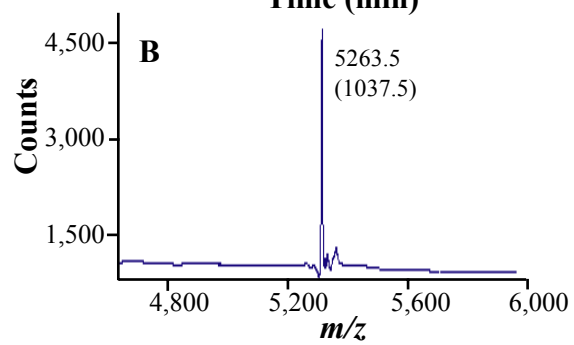

Supplement: pnas_252643299_2.pdf [file pnas_252643299_2.pdf]
